# Supplementary material
Source: Springer Nature journal article supplement (https://www.springermedizin.de/resource/supplementary/12931_2014_1508_MOESM7_ESM.pdf/9426354)

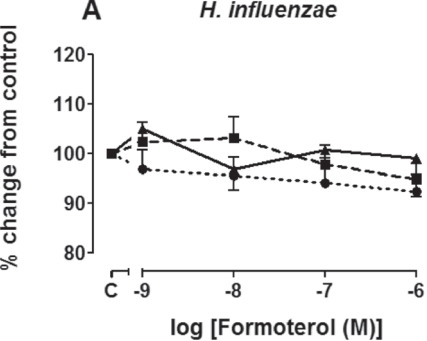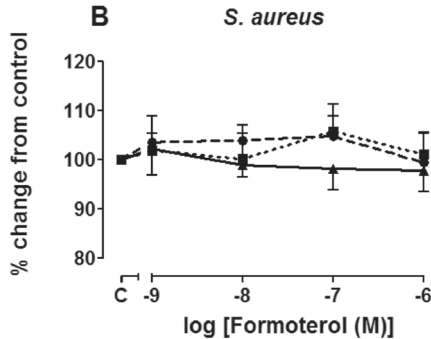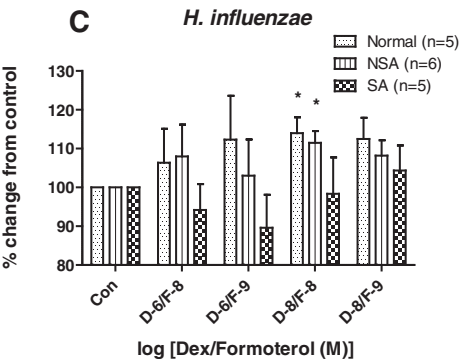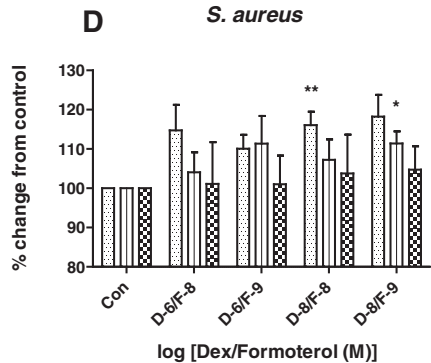

Supplement: MOESM7 [file 9426354]
